# Supplementary material for: Artificial neural networks to investigate the bioavailability of selenium nanoparticles in soil–crop systems
Source: Royal Society of Chemistry journal article supplement (doi:10.1039/d3en00412k), 2023-12-15
Supplement: d3en00412k1.pdf [file d3en00412k1.pdf]

## Supporting Information

### **Artificial neural networks to investigate the bioavailability of selenium nanoparticles in soil-crop system**

Jing Li<sup>ab</sup>, Le Yue<sup>ab</sup>, Feiran Chen<sup>ab</sup>, Xuesong Cao<sup>ab</sup>, Bingxu Cheng<sup>ab</sup>, Chuanxi Wang<sup>\*ab</sup>, Zhenyu Wang<sup>ab</sup>, and Baoshan Xing<sup>c</sup>

<sup>a</sup> Institute of Environmental Processes and Pollution Control, and School of Environment and Civil Engineering, Jiangnan University, Wuxi, Jiangsu, 214122, China

<sup>b</sup> Jiangsu Engineering Laboratory for Biomass Energy and Carbon Reduction Technology, Jiangnan University, Wuxi, Jiangsu, 214122, China

<sup>c</sup> Stockbridge School of Agriculture, University of Massachusetts, Amherst, MA 01003, USA

\*Corresponding author:

*Email address:* [wangcx2018@jiangnan.edu.cn](mailto:wangcx2018@jiangnan.edu.cn) (Dr. Chuanxi Wang)

**Number of pages: 19**

**Number of texts: 1**

**Number of tables: 6**

**Number of figures: 16**

**Text S1** The architecture of the ANN

For yield prediction (GN<sub>120</sub> as output), the effective structure was designed as follows: D30 ANN:  $5 \times 4 \times 1$  using Bias, P\_Ch1\_30, P\_Ht\_30, S\_Eh\_30, and S\_Ec\_30 in the input layer (Figure 3a); D60 ANN:  $5 \times 5 \times 1$  using Bias, P\_Gs\_60, P\_Pn\_60, S\_Ec\_60, and S\_Eh\_60 in the input layer (Figure 3b); D90 ANN:  $6 \times (4 \times 3) \times 1$  using Bias, S<sub>N-NH<sub>4</sub><sup>+</sup></sub>\_90, P\_Ch1\_90, S\_Eh\_90, P\_Pn\_90, as well as S<sub>pH</sub>\_90 in the input layer (Figure 3c); D120 ANN:  $7 \times (5 \times 4) \times 1$  using Bias, P\_Ch1\_120, P\_Fv/Fm\_120, P\_Pn\_120, S<sub>N-NH<sub>4</sub><sup>+</sup></sub>\_120, P\_ADW, as well as P\_RFW in the input layer (Figure 3d).

The chosen architecture ANNs for quality prediction (Se<sub>F</sub> as output) were in general relatively simple (Figure 3). They were designed as follows: D30 ANN:  $5 \times 2 \times 1$  using Bias, P\_Ch1\_30, S\_Eh\_30, S\_TOC\_30, and S<sub>N-NH<sub>4</sub><sup>+</sup></sub>\_30 in the input layer (Figure 3e); D60 ANN:  $5 \times (3 \times 2) \times 1$  using Bias, P\_Gs\_60, P\_PanN\_60, P\_Pn\_60, and S\_TOC\_60 in the input layer (Figure 3f); D90 ANN:  $5 \times 3 \times 1$  using Bias, P\_Gs\_90, S<sub>pH</sub>\_90, P\_Pn\_90, and P\_Ch1\_90 in the input layer (Figure 3g); D120 ANN:  $7 \times (5 \times 4) \times 1$  using Bias, P\_Ch1\_120, P\_RFW, S\_TOC\_120, P\_ADW, P\_AFW, and P\_Fv/Fm\_120 in the input layer (Figure 3h).

**Table S1** the definitions of abbreviations

| Abbreviations                         | Definitions                                                   |
|---------------------------------------|---------------------------------------------------------------|
| <b><i>Plant parameters</i></b>        |                                                               |
| LFW                                   | Leaf fresh weight                                             |
| AFW                                   | Aboveground fresh weight                                      |
| RFW                                   | Root fresh weight                                             |
| LDW                                   | Leaf dry weight                                               |
| ADW                                   | aboveground dry weight                                        |
| RDW                                   | Root dry weight                                               |
| Fe_L                                  | Fe content in leave                                           |
| Fe_S                                  | Fe content in shoot                                           |
| Fe_P                                  | Fe content in whole plant                                     |
| Fe_F                                  | Fe content in fruit                                           |
| Fe_R                                  | Fe content in root                                            |
| Chl                                   | Chlorophyll                                                   |
| Ht                                    | Plant Height                                                  |
| Fv/Fm                                 | Optimal/maximal photochemical efficiency of PS II in the dark |
| Pn                                    | Net photosynthetic rate                                       |
| Gs                                    | Stomatal conductance                                          |
| PanN                                  | Panicle number                                                |
| <b><i>Soil parameters</i></b>         |                                                               |
| S_Ec                                  | Soil electrical conductivity                                  |
| S_Eh                                  | Soil redox potential                                          |
| S_TOC                                 | Soil organic matter                                           |
| S_Fe                                  | Soil Fe content                                               |
| S_Se                                  | Soil Se content                                               |
| S_NH <sub>4</sub> <sup>+</sup> -N     | Soil ammonium nitrogen                                        |
| <b><i>Plant yield and quality</i></b> |                                                               |
| GN_D120                               | Grain number                                                  |
| Se_F                                  | Rice Se content                                               |

**Table S2** Descriptive statistic of the plant physiological activities data.

| Parameters | CK           |        |        |          |          | Ion          |        |        |          |          | NP           |        |        |          |          |
|------------|--------------|--------|--------|----------|----------|--------------|--------|--------|----------|----------|--------------|--------|--------|----------|----------|
|            | Mean±SD      | Min    | Max    | Skewness | Kurtosis | Mean±SD      | Min    | Max    | Skewness | Kurtosis | Mean±SD      | Min    | Max    | Skewness | Kurtosis |
| P_LFW      | 1.9±0.29     | 1.32   | 2.32   | -0.43    | -0.38    | 2.26±0.18    | 2.06   | 2.60   | 0.59     | -1.14    | 3.05±0.32    | 2.64   | 3.60   | 0.25     | -1.5     |
| P_AFW      | 24.92±4.11   | 18.04  | 30.72  | -0.58    | -1.13    | 22.51±4.11   | 17.31  | 29.21  | 0.5      | -1.35    | 35.08±5.81   | 25.58  | 44.15  | 0.08     | -1.14    |
| P_RFW      | 23.36±5.01   | 15.85  | 29.31  | -0.29    | -1.58    | 23.24±4.64   | 15.07  | 28.55  | -0.7     | -1.37    | 25.94±5.92   | 20.59  | 38.32  | 0.97     | -0.47    |
| P_LDW      | 1.55±0.16    | 1.24   | 1.82   | -0.22    | -0.17    | 1.68±0.18    | 1.41   | 1.95   | 0.2      | -1.42    | 2.23±0.22    | 1.87   | 2.56   | 0.24     | -1.32    |
| P_ADW      | 12.81±2.43   | 8.90   | 15.37  | -0.71    | -1.56    | 12.86±3.37   | 8.90   | 17.71  | 0.3      | -1.7     | 19.57±4.13   | 13.70  | 25.87  | 0.08     | -1.44    |
| P_RDW      | 2.74±0.88    | 1.48   | 4.15   | -0.07    | -1.35    | 2.38±0.72    | 1.26   | 3.29   | -0.16    | -1.78    | 2.93±0.85    | 1.91   | 4.03   | 0.02     | -1.97    |
| P_Ht_30    | 50.22±3.57   | 46.00  | 57.00  | 0.8      | -0.94    | 48.17±2.28   | 44.00  | 51.00  | -0.47    | -1.41    | 56.22±3.13   | 51.00  | 62.00  | 0.44     | -0.38    |
| P_Ht_60    | 80.99±2.88   | 75.00  | 84.50  | -0.76    | -0.48    | 78.82±4.22   | 71.00  | 85.40  | -0.12    | -0.73    | 90.51±2.81   | 87.00  | 97.00  | 0.99     | 0.62     |
| P_PanN_60  | 3.08±0.86    | 2.00   | 4.00   | -0.18    | -1.87    | 3.25±0.92    | 2.00   | 5.00   | 0.14     | -0.77    | 5.42±2.18    | 3.00   | 9.00   | 0.49     | -1.03    |
| P_FvFm_60  | 0.81±0.01    | 0.79   | 0.83   | -0.39    | -0.05    | 0.81±0.01    | 0.79   | 0.83   | -0.38    | -0.82    | 0.83±0.01    | 0.81   | 0.84   | -1.15    | 2.72     |
| P_FvFm_90  | 0.83±0.01    | 0.82   | 0.84   | 0        | -0.86    | 0.83±0.01    | 0.81   | 0.84   | -0.14    | -0.77    | 0.84±0       | 0.83   | 0.84   | -1.33    | -0.33    |
| P_FvFm_120 | 0.79±0.02    | 0.76   | 0.82   | 0.11     | -1.45    | 0.8±0.02     | 0.78   | 0.83   | 0.24     | -1.09    | 0.82±0.02    | 0.79   | 0.84   | 0.00     | -1.19    |
| P_Gs_60    | 140.22±16.92 | 116.00 | 163.00 | 0.11     | -1.68    | 172.44±10.99 | 153.00 | 189.00 | -0.15    | -0.97    | 204.22±36.65 | 165.00 | 268.00 | 0.68     | -1.37    |
| P_Gs_90    | 122.22±20.08 | 91.00  | 146.00 | -0.5     | -1.46    | 94.56±11.15  | 74.00  | 112.00 | -0.51    | -0.84    | 157.44±9.69  | 145.00 | 180.00 | 1.12     | 0.78     |
| P_Gs_120   | 107.92±27.15 | 79.00  | 153.00 | 0.76     | -1.49    | 105.44±7.63  | 89.00  | 115.00 | -0.9     | 0.02     | 142.78±22.79 | 118.00 | 176.00 | 0.68     | -1.63    |
| P_Pn_60    | 8.61±1.08    | 6.90   | 10.90  | 0.33     | 0.35     | 8.91±0.77    | 7.80   | 10.20  | 0.58     | -1.17    | 11.18±0.54   | 9.90   | 12.10  | -0.81    | 1.51     |
| P_Pn_90    | 4.92±0.56    | 4.00   | 5.60   | -0.43    | -1.36    | 5.03±0.41    | 4.50   | 6.20   | 1.74     | 5.19     | 8.09±1.25    | 5.70   | 9.80   | -0.62    | -0.8     |
| P_Pn_120   | 4.66±1.1     | 3.30   | 6.20   | -0.03    | -1.58    | 4.63±0.18    | 4.30   | 5.00   | 0.27     | 0.14     | 7.12±0.65    | 6.10   | 7.90   | -0.42    | -1.72    |

| Parameters | CK         |       |       |          |          | Ion        |       |       |          |          | NP         |       |       |          |          |
|------------|------------|-------|-------|----------|----------|------------|-------|-------|----------|----------|------------|-------|-------|----------|----------|
|            | Mean±SD    | Min   | Max   | Skewness | Kurtosis | Mean±SD    | Min   | Max   | Skewness | Kurtosis | Mean±SD    | Min   | Max   | Skewness | Kurtosis |
| P_Fe_L     | 0.53±0.08  | 0.40  | 0.65  | -0.04    | -1.4     | 0.31±0.08  | 0.22  | 0.48  | 0.52     | -0.68    | 0.35±0.1   | 0.22  | 0.51  | -0.04    | -1.35    |
| P_Fe_S     | 0.51±0.09  | 0.39  | 0.65  | 0.27     | -1.39    | 0.5±0.16   | 0.33  | 0.84  | 0.99     | -0.32    | 0.43±0.06  | 0.33  | 0.51  | -0.3     | -1.38    |
| P_Fe_P     | 0.11±0.02  | 0.08  | 0.13  | -0.26    | -1.37    | 0.15±0.04  | 0.09  | 0.22  | 0.18     | -0.16    | 0.1±0.02   | 0.08  | 0.13  | 0.82     | -0.26    |
| P_Fe_F     | 26.92±5.84 | 18.93 | 36.55 | 0.53     | -1.2     | 22.2±2.95  | 16.30 | 27.62 | -0.43    | 0.32     | 23.77±2.7  | 18.84 | 27.80 | -0.35    | -0.88    |
| P_Fe_R     | 24.78±5.28 | 17.15 | 31.80 | -0.33    | -1.52    | 24.37±5.73 | 16.18 | 32.01 | -0.18    | -1.58    | 21.36±1.63 | 18.26 | 24.09 | 0        | -0.59    |
| P_Ch1_30   | 38.33±1.93 | 35.70 | 40.90 | -0.05    | -1.72    | 39.86±2.31 | 36.60 | 43.90 | 0.69     | -0.94    | 43.99±1.78 | 41.00 | 46.90 | 0.26     | -0.91    |
| P_Ch1_60   | 30.23±1.67 | 26.90 | 32.60 | -0.26    | -0.52    | 32.15±1.78 | 28.50 | 34.50 | -0.91    | 0.02     | 36.98±1.38 | 35.60 | 40.50 | 1.51     | 2.32     |
| P_Ch1_90   | 18.17±4.36 | 10.70 | 25.00 | 0.21     | -1.1     | 16.58±3.83 | 12.20 | 24.40 | 0.79     | -0.61    | 27.57±2.35 | 23.40 | 31.90 | 0.05     | -0.41    |
| P_Ch1_120  | 7.84±0.64  | 6.30  | 8.60  | -1.3     | 1.25     | 8.49±1.2   | 5.70  | 9.90  | -1.05    | 0.63     | 11.19±1.36 | 9.20  | 13.50 | 0.22     | -1.09    |

**Table S3** Descriptive statistic of the soil properties and plant response.

| Parameters   | CK           |        |        |          |          | Ion          |        |        |          |          | NP           |        |        |          |          |
|--------------|--------------|--------|--------|----------|----------|--------------|--------|--------|----------|----------|--------------|--------|--------|----------|----------|
|              | Mean±SD      | Min    | Max    | Skewness | Kurtosis | Mean±SD      | Min    | Max    | Skewness | Kurtosis | Mean±SD      | Min    | Max    | Skewness | Kurtosis |
| S_EC_30      | 0.38±0.08    | 0.28   | 0.48   | 0.01     | -1.65    | 0.4±0.06     | 0.34   | 0.48   | 0.77     | -1.62    | 0.4±0.05     | 0.35   | 0.46   | 0.67     | -1.65    |
| S_EC_60      | 0.32±0.06    | 0.25   | 0.40   | 0.2      | -1.62    | 0.36±0.04    | 0.32   | 0.42   | 0.74     | -1.6     | 0.31±0.06    | 0.26   | 0.39   | 0.8      | -1.63    |
| S_EC_90      | 0.34±0.08    | 0.23   | 0.45   | -0.01    | -1.65    | 0.32±0.06    | 0.25   | 0.41   | 0.49     | -1.48    | 0.35±0.06    | 0.27   | 0.42   | -0.03    | -1.65    |
| S_EC_120     | 0.38±0.05    | 0.30   | 0.44   | -0.45    | -1.62    | 0.43±0.04    | 0.39   | 0.49   | 0.65     | -1.64    | 0.41±0.08    | 0.30   | 0.49   | -0.68    | -1.65    |
| S_Eh_30      | 259.83±19.73 | 238.00 | 285.90 | 0.26     | -1.86    | 278.4±13.67  | 259.80 | 296.00 | -0.22    | -1.6     | 272.91±11.1  | 252.10 | 284.90 | -0.7     | -1.12    |
| S_Eh_60      | 255.68±12.28 | 235.40 | 271.10 | -0.59    | -1.49    | 265.24±16    | 237.30 | 287.00 | -0.64    | -1.11    | 272±18.96    | 242.70 | 297.10 | -0.44    | -1.52    |
| S_Eh_90      | 285.93±29.71 | 243.00 | 328.80 | 0.07     | -1.58    | 287.34±22.04 | 247.20 | 316.90 | -0.66    | -0.9     | 289.62±19.04 | 261.30 | 312.30 | -0.46    | -1.66    |
| S_Eh_120     | 304.01±11.34 | 284.30 | 320.10 | -0.52    | -1.18    | 290.36±7.78  | 272.70 | 301.10 | -0.68    | 0.6      | 293.08±5.41  | 281.80 | 302.30 | -0.49    | 0.33     |
| S_N-NH4+_30  | 1.17±0.39    | 0.51   | 1.72   | -0.51    | -0.71    | 1.09±0.34    | 0.73   | 1.72   | 0.78     | -1.06    | 1.18±0.48    | 0.68   | 2.01   | 0.69     | -1.36    |
| S_N-NH4+_60  | 2.63±0.36    | 2.03   | 3.02   | -0.73    | -1.5     | 2.48±0.24    | 2.11   | 2.73   | -0.8     | -1.5     | 2.63±0.31    | 2.21   | 3.05   | -0.22    | -1.6     |
| S_N-NH4+_90  | 4.18±1.22    | 2.86   | 5.89   | 0.48     | -1.64    | 4.14±0.78    | 3.17   | 5.17   | 0.19     | -1.65    | 4.13±0.79    | 3.14   | 5.16   | 0.16     | -1.64    |
| S_N-NH4+_120 | 4.59±0.65    | 3.98   | 5.54   | 0.72     | -1.64    | 5.26±0.44    | 4.82   | 5.93   | 0.75     | -1.55    | 4.62±1.17    | 3.18   | 6.22   | 0.25     | -1.63    |
| S_Fe_30      | 24.69±6.64   | 16.16  | 33.28  | -0.2     | -1.63    | 22.74±6.32   | 15.13  | 31.66  | 0.38     | -1.61    | 22.49±4.36   | 16.64  | 27.99  | -0.05    | -1.6     |
| S_Fe_60      | 20.29±6.72   | 11.71  | 35.01  | 0.46     | 0.2      | 20.54±5.92   | 11.48  | 27.11  | -0.72    | -1.57    | 19.89±5.15   | 11.81  | 25.58  | -0.65    | -1.6     |
| S_Fe_90      | 19.45±5.4    | 10.79  | 25.19  | -0.76    | -1.49    | 19.25±5.15   | 11.67  | 25.38  | -0.48    | -1.61    | 18.42±4.17   | 11.42  | 22.54  | -0.79    | -1.45    |
| S_Fe_120     | 20.29±6.72   | 11.71  | 35.01  | 0.46     | 0.2      | 20.54±5.92   | 11.48  | 27.11  | -0.72    | -1.57    | 20.16±5.33   | 11.81  | 25.43  | -0.67    | -1.63    |
| S_pH_30      | 7.52±0.25    | 7.16   | 7.82   | -0.65    | -1.61    | 7.53±0.16    | 7.34   | 7.74   | 0.31     | -1.65    | 7.55±0.18    | 7.29   | 7.77   | -0.24    | -1.79    |
| S_pH_60      | 7.12±0.12    | 6.97   | 7.31   | 0.54     | -1.46    | 7.2±0.14     | 7.01   | 7.43   | 0.43     | -1.4     | 7.22±0.1     | 7.13   | 7.40   | 0.79     | -1.17    |

| Parameters | CK          |       |        |          |          | Ion          |        |        |          |          | NP           |        |        |          |          |
|------------|-------------|-------|--------|----------|----------|--------------|--------|--------|----------|----------|--------------|--------|--------|----------|----------|
|            | Mean±SD     | Min   | Max    | Skewness | Kurtosis | Mean±SD      | Min    | Max    | Skewness | Kurtosis | Mean±SD      | Min    | Max    | Skewness | Kurtosis |
| S_pH_90    | 7.17±0.1    | 7.01  | 7.29   | -0.63    | -1.32    | 7.2±0.15     | 6.99   | 7.40   | -0.28    | -1.58    | 7.16±0.1     | 7.00   | 7.34   | -0.2     | -0.67    |
| S_pH_120   | 7.07±0.15   | 6.84  | 7.24   | -0.51    | -1.54    | 7.17±0.18    | 6.93   | 7.40   | 0.06     | -1.8     | 7.07±0.16    | 6.84   | 7.27   | -0.32    | -1.68    |
| S_TOC_30   | 63.31±1.98  | 58.70 | 66.40  | -0.88    | 1.12     | 63.11±3.01   | 56.90  | 69.20  | 0.03     | 1.01     | 61.59±1.02   | 60.00  | 63.90  | 0.87     | 0.81     |
| S_TOC_60   | 66.29±2.74  | 60.20 | 69.80  | -0.74    | 0.07     | 60.47±3.52   | 55.60  | 66.60  | 0.37     | -1.21    | 62.87±3.6    | 56.00  | 67.80  | -0.57    | -0.86    |
| S_TOC_90   | 61.96±2.8   | 56.70 | 67.40  | 0.02     | 0.39     | 63.55±2.55   | 57.10  | 66.40  | -1.51    | 2.32     | 60.43±2.85   | 55.20  | 65.30  | -0.3     | -0.3     |
| S_TOC_120  | 63.61±2.79  | 59.90 | 69.30  | 0.56     | -0.63    | 61.79±3.7    | 53.70  | 66.90  | -0.59    | 0.32     | 60.79±2.99   | 56.50  | 65.10  | -0.5     | -1.48    |
| S_Se_30    | 0.15±0.04   | 0.08  | 0.20   | -0.59    | -1.38    | 0.33±0.12    | 0.18   | 0.58   | 0.57     | -0.48    | 0.4±0.18     | 0.21   | 0.70   | 0.48     | -1.48    |
| S_Se_60    | 0.09±0.06   | 0.02  | 0.18   | -0.18    | -1.32    | 0.21±0.03    | 0.16   | 0.25   | -0.43    | -1.4     | 0.18±0.03    | 0.15   | 0.24   | 0.76     | -0.24    |
| S_Se_90    | 0.1±0.04    | 0.05  | 0.17   | 0.35     | -1.17    | 0.15±0.08    | 0.06   | 0.27   | 0.32     | -1.69    | 0.19±0.03    | 0.15   | 0.24   | 0.46     | -0.34    |
| S_Se_120   | 0.09±0.06   | 0.02  | 0.18   | -0.18    | -1.32    | 0.21±0.03    | 0.16   | 0.25   | -0.43    | -1.4     | 0.12±0.07    | 0.04   | 0.24   | 0.53     | -1.48    |
| Se_F       | 0.11±0.03   | 0.08  | 0.17   | 0.85     | -1.22    | 0.32±0.11    | 0.19   | 0.54   | 0.72     | -0.36    | 0.39±0.18    | 0.18   | 0.64   | 0.57     | -1.62    |
| GN_120     | 112.89±15.3 | 88.00 | 133.00 | -0.38    | -1.66    | 123.89±11.25 | 102.00 | 140.00 | -0.2     | -0.72    | 149.78±20.72 | 117.00 | 180.00 | -0.15    | -1.39    |

**Table S4** correlation between features and outcomes

| Plant parameters | Grainnumber120d | FruitSe(g/kg) | Soil parameters           | Grainnumber120d | FruitSe(g/kg) |
|------------------|-----------------|---------------|---------------------------|-----------------|---------------|
| P_LFW            | 0.584**         | 0.503**       | S_pH_30                   | -0.188          | 0.269         |
| P_AFW            | 0.616**         | 0.676**       | S_Ec_30                   | -0.483**        | 0.037         |
| P_RFW            | 0.453**         | 0.623**       | S_Eh_30                   | 0.655**         | 0.437**       |
| P_LDW            | 0.500**         | 0.260         | S_TOC_30                  | -0.368*         | -0.358*       |
| P_ADW            | 0.637**         | 0.784**       | S_Fe_30                   | -0.423*         | 0.040         |
| P_RDW            | 0.324           | 0.495**       | S_Se_30                   | 0.226           | -0.020        |
| P_Fe_L           | -0.136          | -0.309        | S_NH4 <sup>+</sup> -N_30  | 0.221           | -0.389*       |
| P_Fe_S           | -0.410*         | -0.077        | S_pH_60                   | -0.263          | 0.134         |
| P_Fe_P           | -0.191          | 0.127         | S_EC_60                   | -0.666**        | -0.063        |
| P_Fe_F           | -0.138          | -0.486**      | S_Eh_60                   | 0.757**         | 0.461**       |
| P_Fe_R           | 0.091           | -0.315        | S_TOC_60                  | -0.403*         | -0.656**      |
| P_Ch1_30         | 0.795**         | 0.755**       | S_Fe_60                   | -0.128          | 0.317         |
| P_Ht_30          | 0.464**         | 0.044         | S_Se_60                   | 0.124           | 0.300         |
| P_Fv/Fm_60       | 0.400*          | 0.311         | S_NH4 <sup>+</sup> -N_60  | 0.603**         | 0.128         |
| P_Pn_60          | 0.772**         | 0.550**       | S_pH_90                   | -0.463**        | -0.412*       |
| P_Gs_60          | 0.727**         | 0.871**       | S_Ec_90                   | -0.192          | 0.259         |
| P_Ch1_60         | 0.617**         | 0.472**       | S_Eh_90                   | 0.629**         | 0.220         |
| P_Ht_60          | 0.504**         | 0.388*        | S_TOC_90                  | -0.381*         | -0.193        |
| P_PanN_60        | 0.619**         | 0.773**       | S_Fe_90                   | -0.200          | 0.272         |
| P_Fv/Fm_90       | 0.487**         | 0.352*        | S_Se_90                   | 0.098           | 0.378*        |
| P_Pn_90          | 0.786**         | 0.567**       | S_NH4 <sup>+</sup> -N_90  | 0.583**         | 0.276         |
| P_Gs_90          | 0.376*          | 0.349*        | S_pH_120                  | -0.495**        | -0.361*       |
| P_Ch1_90         | 0.788**         | 0.520**       | S_Ec_120                  | -0.054          | 0.533**       |
| P_Fv/Fm_120      | 0.589**         | 0.739**       | S_Eh_120                  | -0.001          | -0.422*       |
| P_Pn_120         | 0.689**         | 0.479**       | S_TOC_120                 | -0.433**        | -0.674**      |
| P_Gs_120         | 0.420*          | 0.022         | S_Fe_120                  | -0.094          | 0.346*        |
| P_Ch1_120        | 0.737**         | 0.605**       | S_Se_120                  | -0.409*         | -0.006        |
|                  |                 |               | S_NH4 <sup>+</sup> -N_120 | 0.498**         | 0.540**       |

\*\* . P<0.01

\* . P<0.05



**Table S5** Model results for yield prediction

|                    | Training | Testing | Validation |
|--------------------|----------|---------|------------|
| <b><i>D30</i></b>  |          |         |            |
| MAE                | 5.142    | 8.871   | 6.761      |
| SD                 | 6.293    | 10.956  | 7.969      |
| R <sup>2</sup>     | 0.947    | 0.869   | 0.785      |
| RMSE               | 6.12     | 10.87   | 7.58       |
| <b><i>D60</i></b>  |          |         |            |
| MAE                | 6.298    | 13.692  | 8.276      |
| SD                 | 7.54     | 12.071  | 11.491     |
| R <sup>2</sup>     | 0.893    | 0.792   | 0.714      |
| RMSE               | 8.22     | 14.96   | 11.27      |
| <b><i>D90</i></b>  |          |         |            |
| MAE                | 5.578    | 7.486   | 7.056      |
| SD                 | 7.328    | 8.18    | 8.724      |
| R <sup>2</sup>     | 0.891    | 0.935   | 0.830      |
| RMSE               | 7.20     | 7.76    | 9.38       |
| <b><i>D120</i></b> |          |         |            |
| MAE                | 4.381    | 8.468   | 7.543      |
| SD                 | 6.875    | 10.431  | 10.145     |
| R <sup>2</sup>     | 0.876    | 0.960   | 0.893      |
| RMSE               | 6.91     | 9.44    | 10.14      |

**Table S6** Model results for quality prediction

|                    | Training | Testing | Validation |
|--------------------|----------|---------|------------|
| <b><i>D30</i></b>  |          |         |            |
| MAE                | 0.075    | 0.089   | 0.064      |
| SD                 | 0.09     | 0.102   | 0.08       |
| R <sup>2</sup>     | 0.709    | 0.815   | 0.729      |
| MSE                | 0.09     | 0.09    | 0.08       |
| <b><i>D60</i></b>  |          |         |            |
| MAE                | 0.107    | 0.085   | 0.092      |
| SD                 | 0.123    | 0.097   | 0.109      |
| R <sup>2</sup>     | 0.762    | 0.832   | 0.867      |
| MSE                | 0.12     | 0.10    | 0.11       |
| <b><i>D90</i></b>  |          |         |            |
| MAE                | 0.032    | 0.038   | 0.065      |
| SD                 | 0.048    | 0.044   | 0.115      |
| R <sup>2</sup>     | 0.906    | 0.904   | 0.760      |
| MSE                | 0.05     | 0.05    | 0.11       |
| <b><i>D120</i></b> |          |         |            |
| MAE                | 0.026    | 0.113   | 0.041      |
| SD                 | 0.049    | 0.092   | 0.051      |
| R <sup>2</sup>     | 0.933    | 0.962   | 0.762      |
| MSE                | 0.08     | 0.05    | 0.05       |

### D30

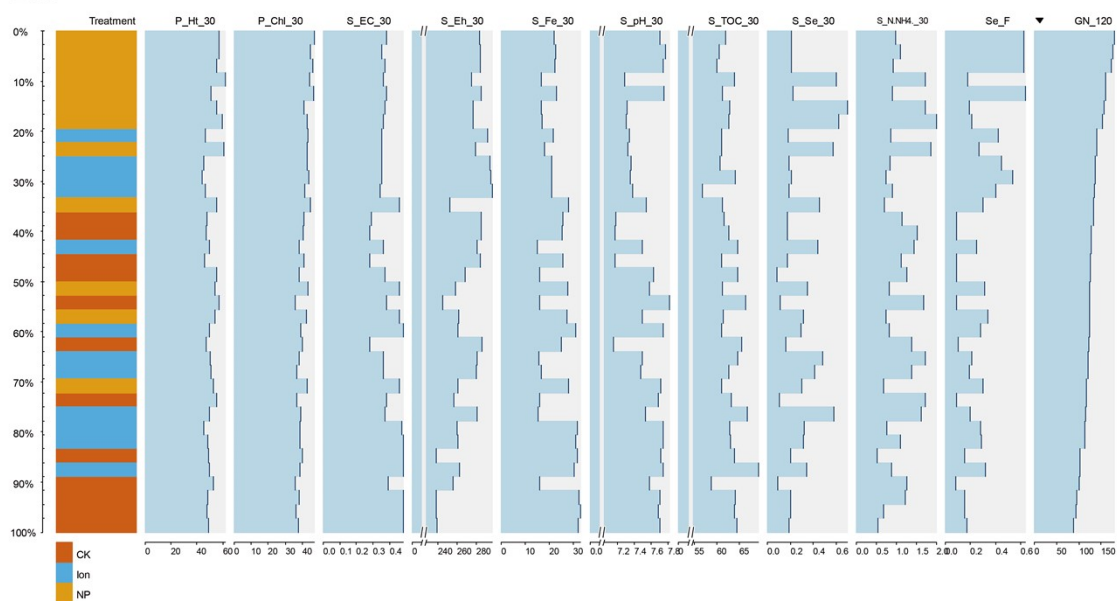

**Fig. S1.** Visualization of the raw data distribution at D30. Samples are arranged in descending order of the rice yield (GN\_120).

### D60

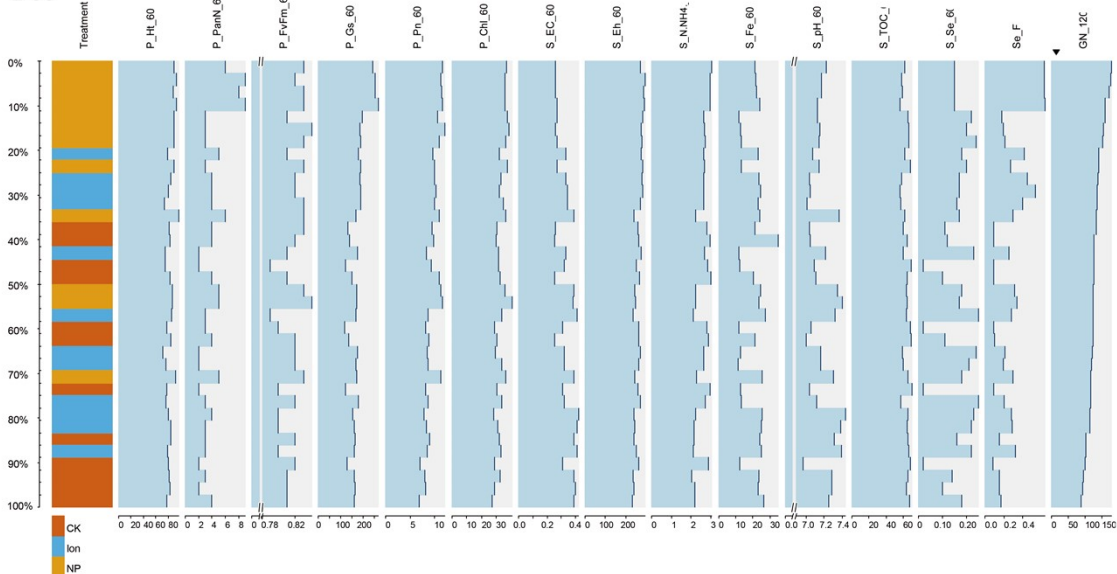

**Fig. S2.** Visualization of the raw data distribution at D60. Samples are arranged in descending order of the rice yield (GN\_120).

### D90

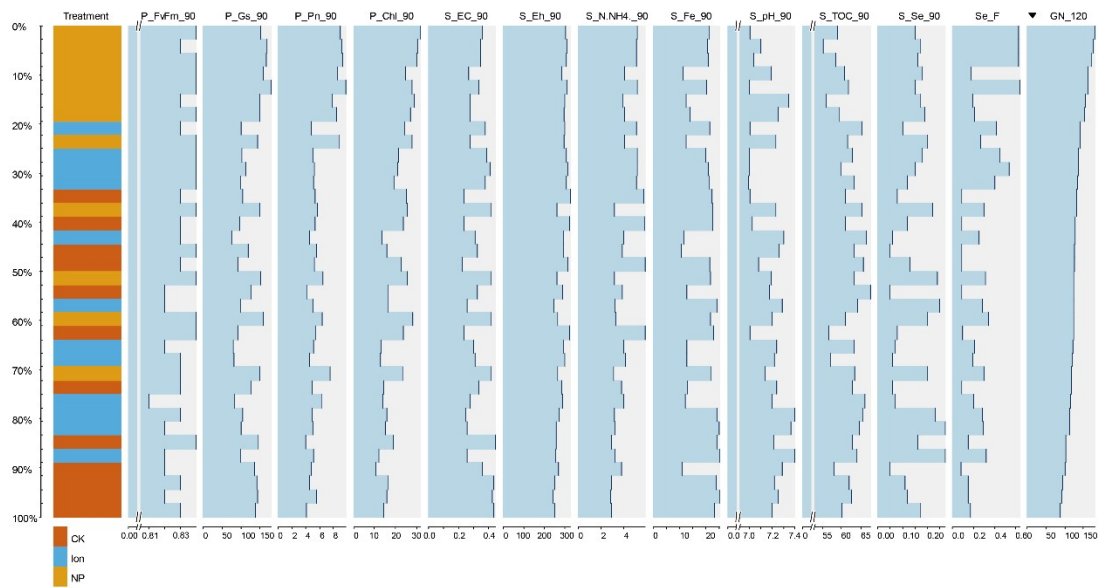

**Fig. S3.** Visualization of the raw data distribution at D90. Samples are arranged in descending order of the rice yield (GN\_120).

## D120

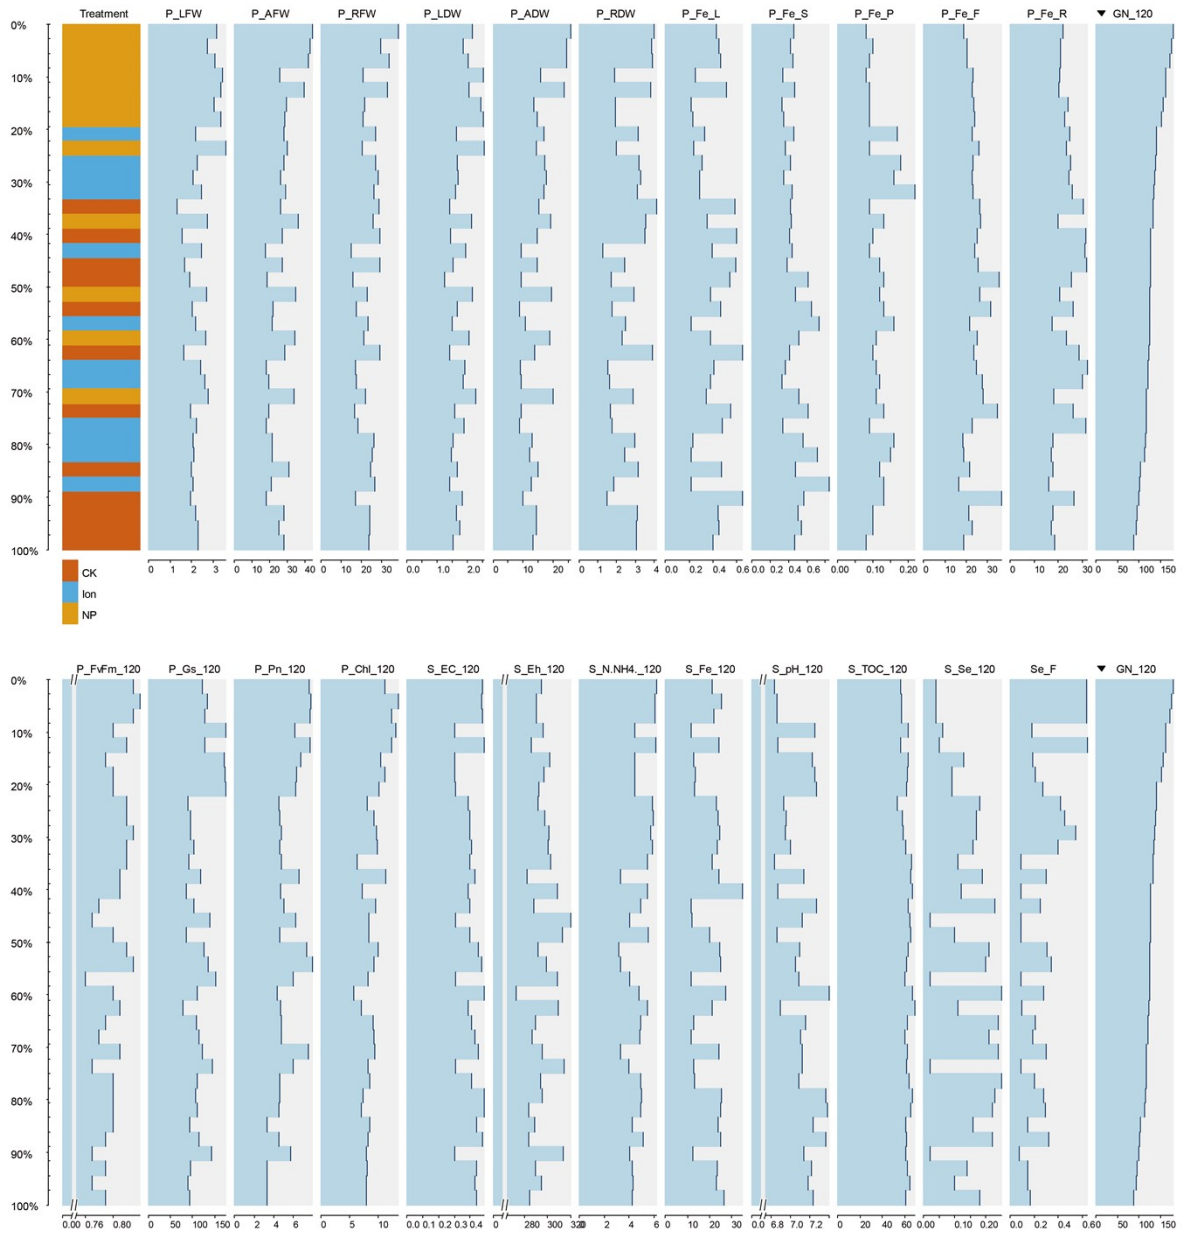

**Fig. S4.** Visualization of the raw data distribution at D120. Samples are arranged in descending order of the rice yield (GN\_120).

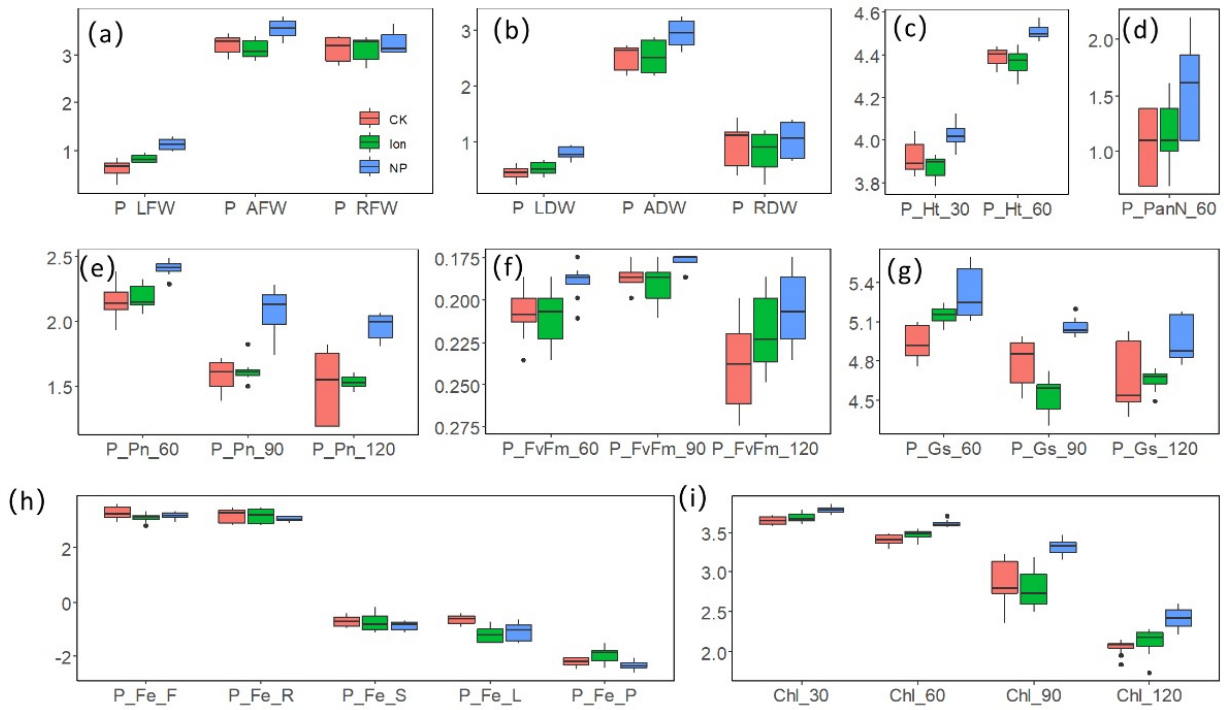

**Fig. S5.** Boxplot of plant physiological data. To better display the data relationships, the data were Ln transformed.

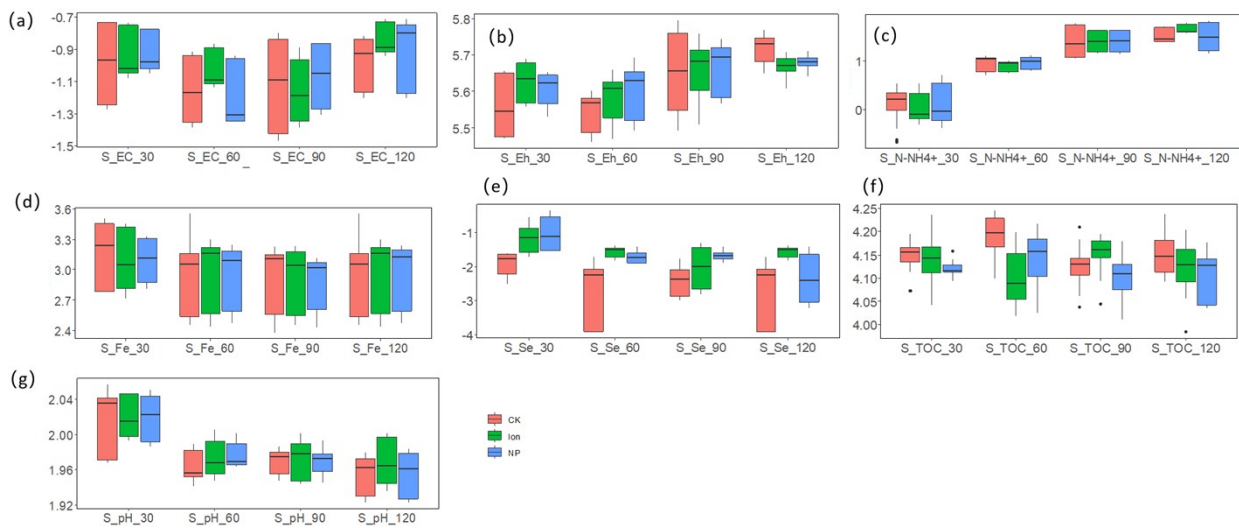

**Fig. S6.** Boxplot of soil properties data. To better display the data relationships, the data were Ln transformed.

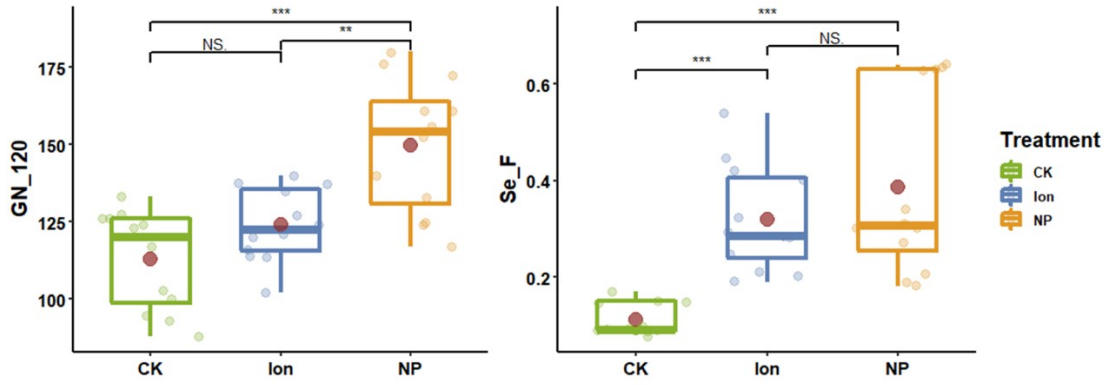

**Fig. S7** the effect of treatments on rice yield (left) and quality (right).

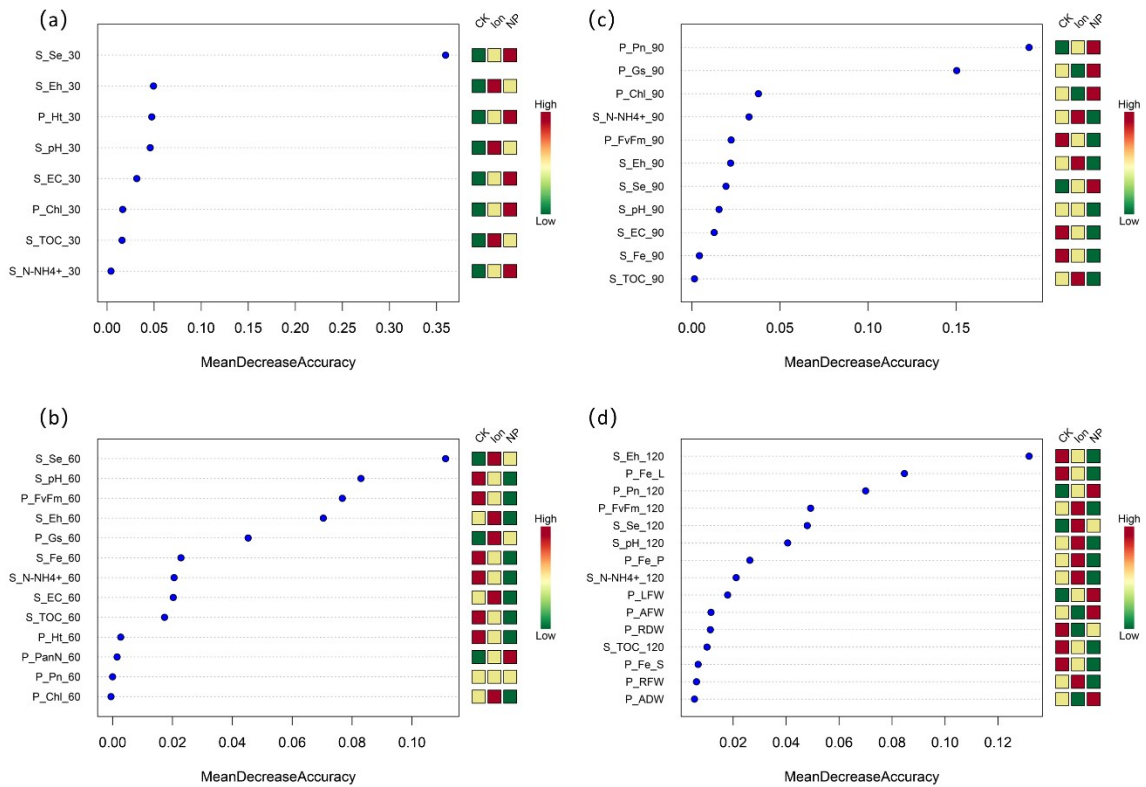

**Fig. S8.** A random forest (RF) approach was used to select the highest contribution to the variance in the different treatment groups on (a) day 30, (b) day 60, (c) day 90, (d) day 120. The horizontal coordinate is the average importance and the vertical coordinate is the plant and soil index, and the heatmap shows the relative differences between different groups.

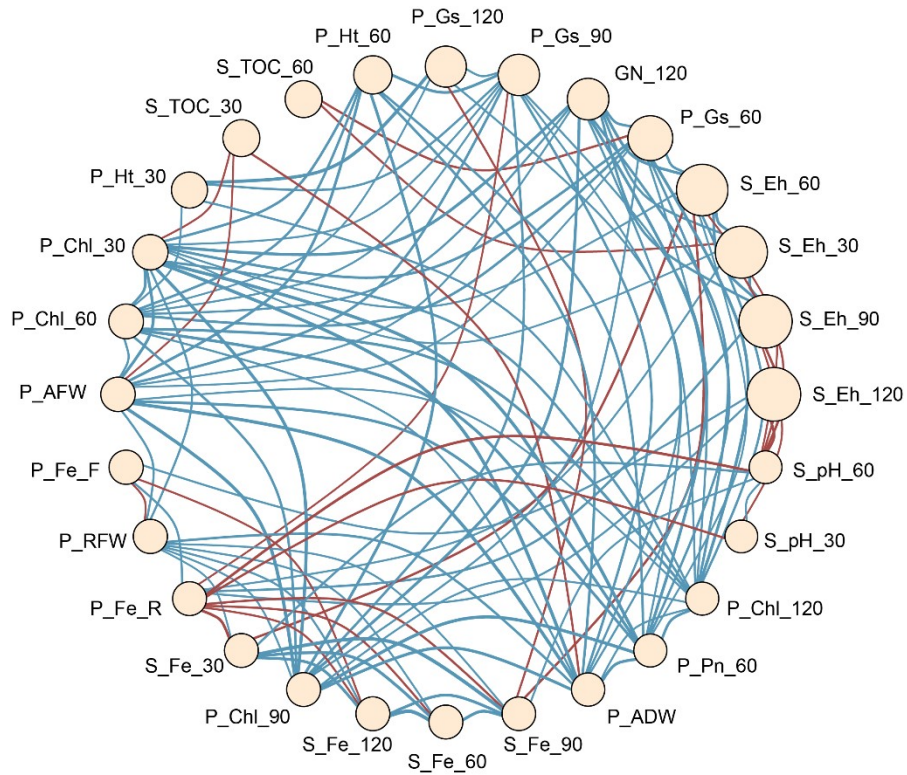

**Fig. S9.** Co-occurrence networks of plant and soil features. Nodes represent the basic units of a network. Light blue lines represent a significant positive correlation and red lines represent a significant negative correlation.

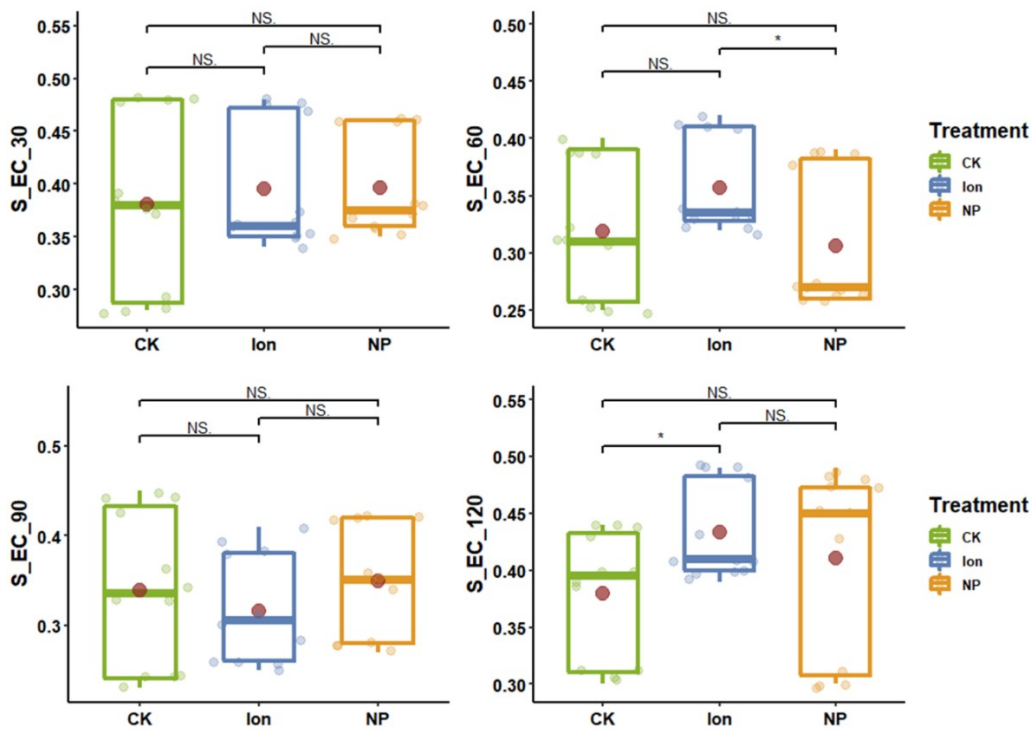

**Fig. S10** the effect of treatments on soil Ec.



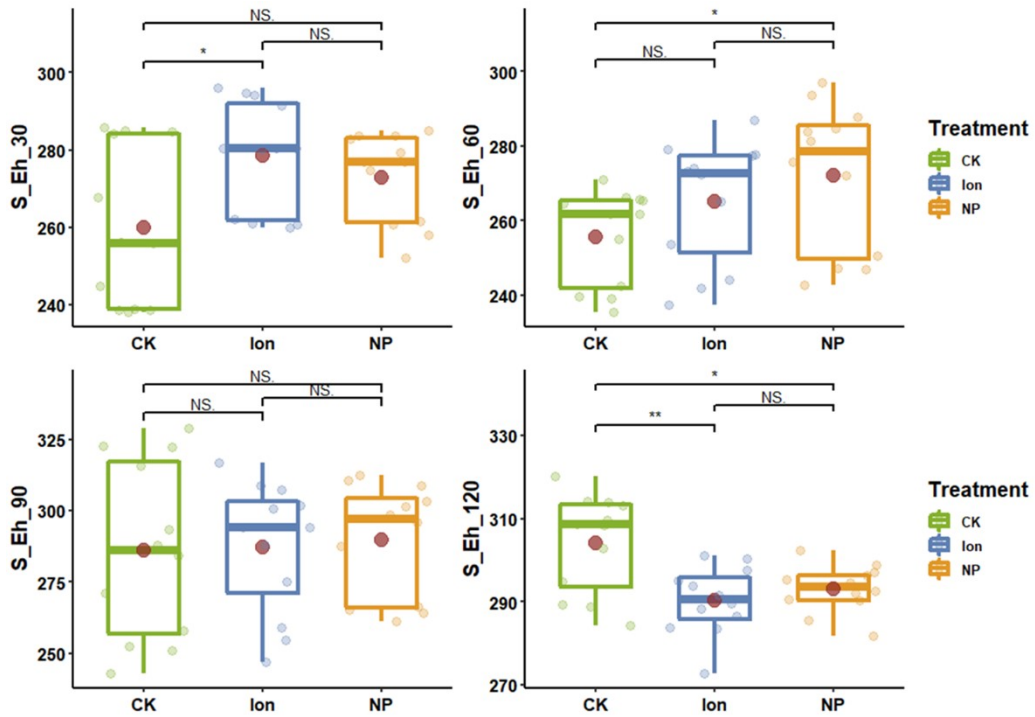

Fig. S11 the effect of treatments on soil Eh.

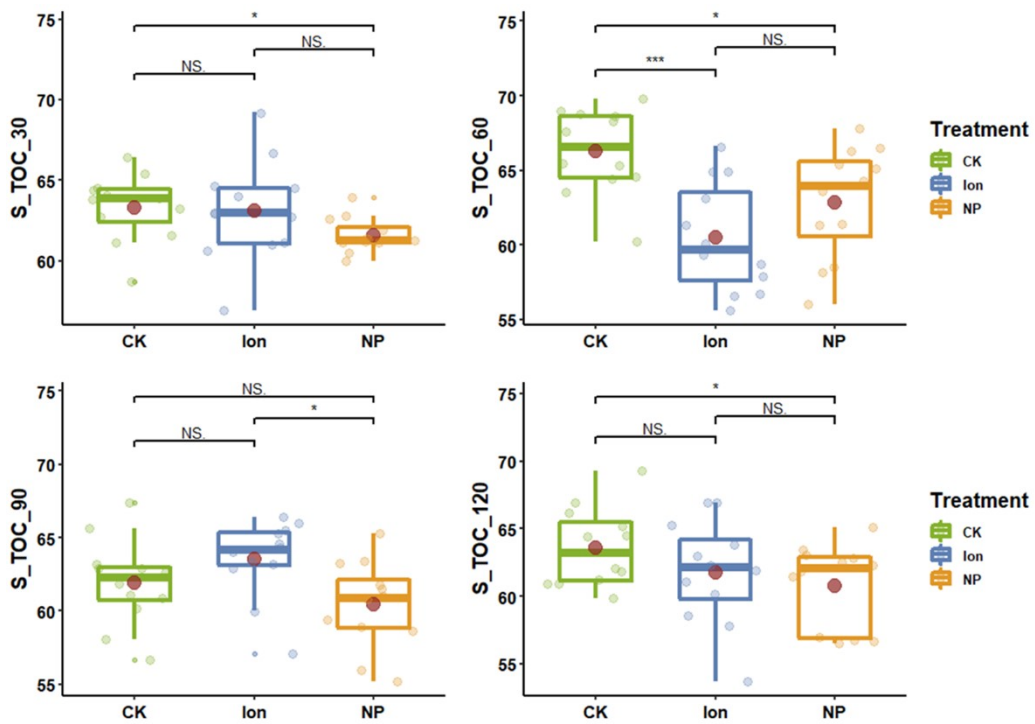

Fig. S12 the effect of treatments on soil TOC.

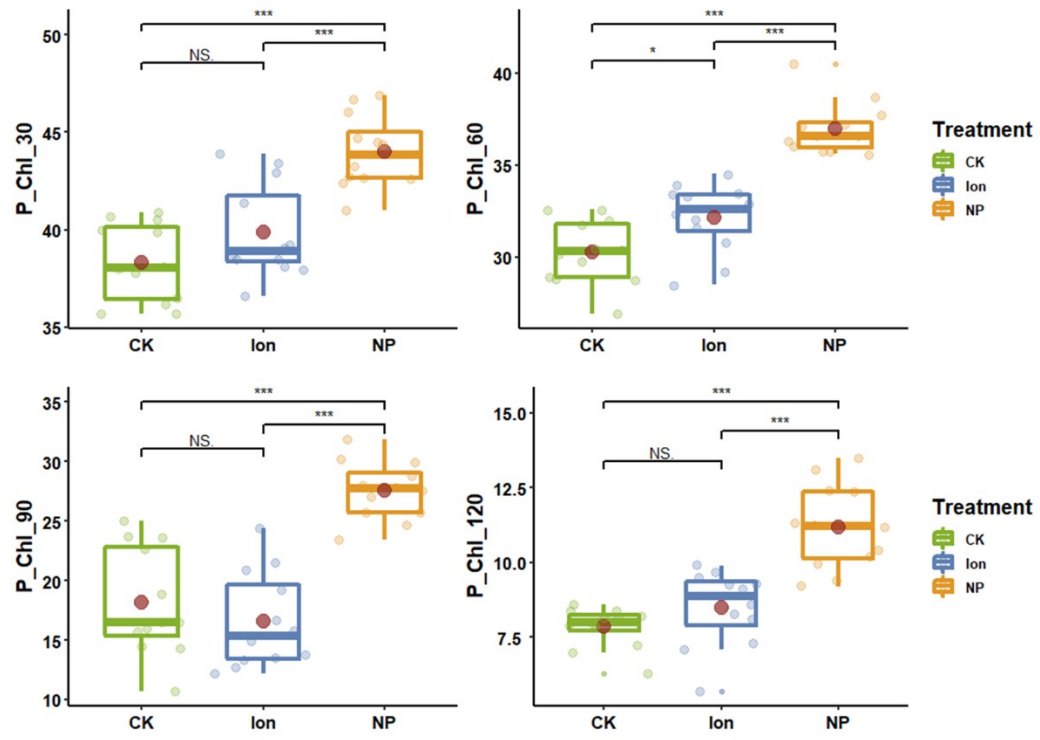

Fig. S13 the effect of treatments on Chl.

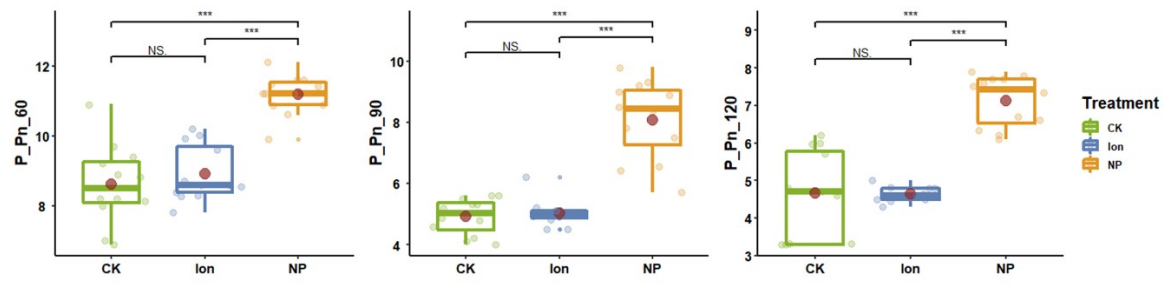

**Fig. S14** the effect of treatments on Pn.

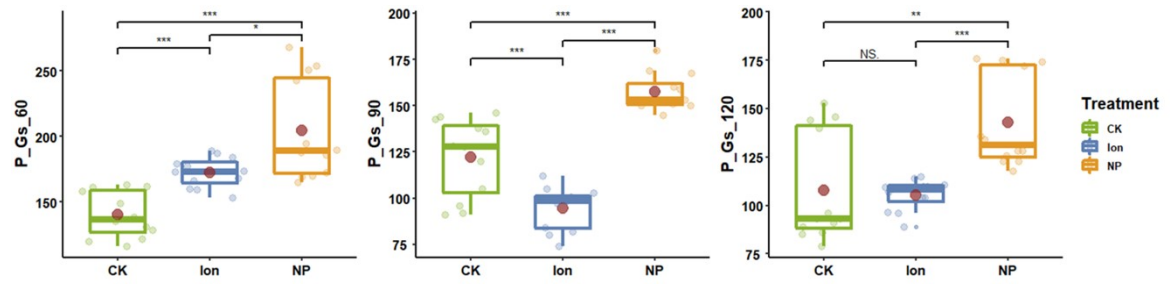

**Fig. S15** the effect of treatments on Gs.

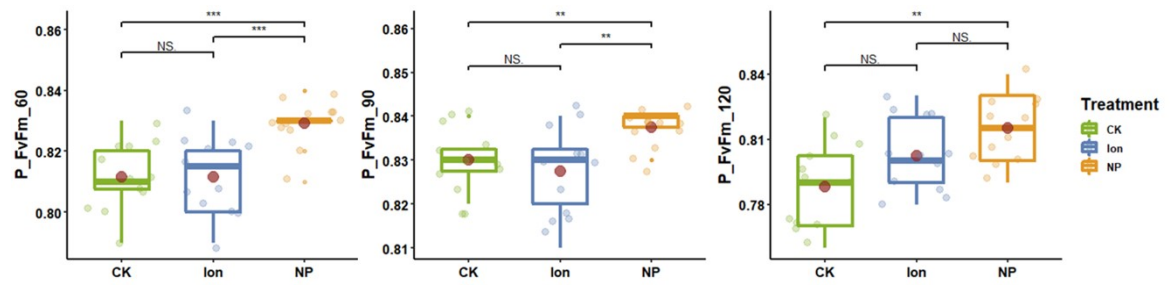

**Fig. S16** the effect of treatments on Fv/Fm.
